# Supplementary material
Source: PubMed Central journal article supplement (PMC3501017)
Supplement: supp_M112.375964_jbc.M112.375964-1.pdf [file supp_M112.375964_jbc.M112.375964-1.pdf]

**Supporting information only for review (not for inclusion in the manuscript)**

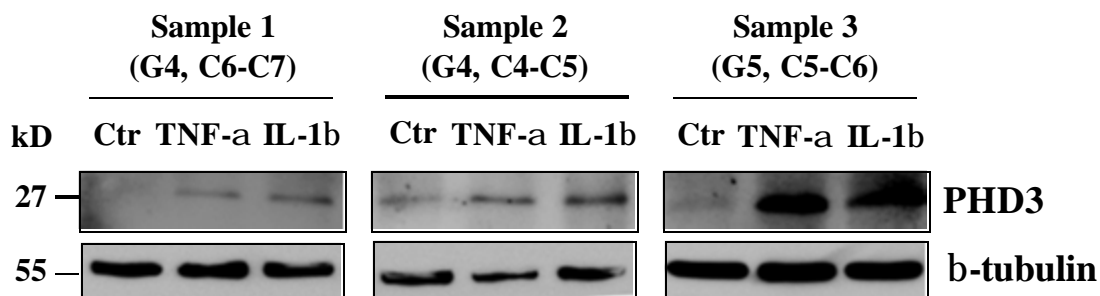

Response of human NP cells to cytokine treatment. Human NP cells show induction in PHD3 levels following treatment with TNF- $\alpha$  and IL-1 $\beta$

**Table: Human Tissues used for Cell Isolation**

| Pfirrmann Grade | Age (years) | Gender | Level | Pathology  |
|-----------------|-------------|--------|-------|------------|
| G2              | 39          | M      | L5-S1 | DDD        |
| G4              | 60          | F      | C4-C5 | Myelopathy |
| G4              | 64          | F      | C6-C7 | Myelopathy |
| G5              | 60          | F      | C5-C6 | Myelopathy |

DDD: Degenerative Disc Disease

Cells isolated from minimally degenerate (G2) tissue sample are use for experiments presented in the manuscript
